# Supplementary material
Source: publisher figshare collection journal article supplement (https://geolsoc.figshare.com/ndownloader/files/24182826)
Supplement: Supplementary file 1 [file 24182826]

Sample.ID	Project	N	d13C.sd	d13C.se	d13C.avg	d18O.sd	d18O.se	d18O.avg	D47.sd	D47.se	D47.2se	D47.90.noAD.avg	D47.90.avg	D47.25D.avg	D47.25P.avg	D48.sd	D48.se	D48.2se	D48.90.avg	D48.sd.all	D48.se.all	D48.2se.all	D48.90.avg.all	T.B	T.B.se	T.G	T.G.se	T.P	T.P.se	d18Ow.B	d18Ow.B.se	d18Ow.G	d18Ow.G.se	d18Ow.P	d18Ow.P.se
Carrara.CIT	all	4	0.185416472	0.092708236	1.907064831	0.364303045	0.182151523	-1.808796508	0.0605576	0.0302788	0.0605576	0.399130469	0.348742562	0.430742562	0.436742562	0.160711193	0.080355597	0.160711193	0.142723526	0.126357606	0.063178803	0.126357606	0.14597075	162.3	25.6	109	23.5	189.7	28.1	19.8	2.5	14	2.9	22.3	2.4
CU TS	int.standards	5	0.018767969	0.008393291	1.968317705	0.149487138	0.066852681	-2.221247368	0.026814353	0.011991743	0.023983487	0.357992585	0.299781919	0.381781919	0.387781919	0.096750684	0.043268221	0.086536443	0.279002175	0.076069281	0.034019217	0.068038433	0.253118506	219.9	27.4	132.5	22	270.1	28.9	24.4	2.1	16.3	2.5	27.8	1.8
CU YULE	int.standards	1	#NUM!	#NUM!	-3.104659706	#NUM!	#NUM!	-6.522352701	#NUM!	#NUM!	#NUM!	0.308493775	0.24087044	0.32287044	0.32887044	#NUM!	#NUM!	#NUM!	0.346811802	#NUM!	#NUM!	#NUM!	0.306433163	333.5	#NUM!	167.5	#NUM!	462	#NUM!	27	#NUM!	15.5	#NUM!	32.3	#NUM!
dBBEG	all	4	0.036530633	0.018265316	-10.48755069	0.197572788	0.098786394	-20.02489758	0.036252079	0.018126039	0.036252079	0.992968869	1.055504972	1.137504972	1.143504972	0.023551959	0.01177598	0.023551959	0.274520849	0.018517498	0.009258749	0.018517498	0.249595108	-60.1	3.3	-37.2	3.7	-65.2	3.5	-41.1	1.3	-33.2	1.2	-43.1	1.4
dBBHG	all	6	0.069819026	0.028503498	-10.50775021	0.454170896	0.185414492	-20.71566159	0.034604902	0.014127392	0.028254784	0.031517799	-0.088775147	-0.006775147	-0.000775147	0.125549395	0.051255326	0.102510652	0.027803025	0.098711986	0.040298999	0.080597999	0.055615628	#NUM!	#NUM!	#NUM!	#NUM!	#NUM!	#NUM!	#NUM!	#NUM!	#NUM!	#NUM!	#NUM!	#NUM!
eYSEG	all	6	0.034238341	0.013977744	-11.19720167	0.156532739	0.063904223	11.08615457	0.022979091	0.009381175	0.018762349	0.880338208	0.921456521	1.003456521	1.009456521	0.082552385	0.03370187	0.06740374	0.392281486	0.064906006	0.026497766	0.052995532	0.342183258	-42.8	2.8	-22	3.4	-47.4	3.3	-4.4	0.9	2.1	1	-6	1.2
eYSHG	all	4	0.013950014	0.006975007	-11.16578647	0.785646508	0.392823254	5.189431662	0.016111722	0.008055861	0.016111722	0.033946152	-0.08588502	-0.00388502	0.00211498	0.054269108	0.027134554	0.054269108	0.027079324	0.042668556	0.021334278	0.042668556	0.055046625	#NUM!	#NUM!	8560.8	#NUM!	#NUM!	#NUM!	#NUM!	#NUM!	68.2	#NUM!	#NUM!	#NUM!
Katie's Spar	int.standards	2	0.070914022	0.050143786	0.054722502	0.374348427	0.264704311	-27.92354811	0.000829753	0.000586724	0.001173448	0.502997022	0.472360327	0.554360327	0.560360327	0.04594356	0.032487003	0.064974006	0.254048992	0.036122675	0.025542589	0.051085178	0.23349931	76	4.2	64.1	2.5	82.8	2.6	-17	0.7	-18.7	0.5	-16	0.4
LCL2012-5	Marina	1	#NUM!	#NUM!	4.844585645	#NUM!	#NUM!	-2.727170428	#NUM!	#NUM!	#NUM!	0.562090131	0.542690551	0.624690551	0.630690551	#NUM!	#NUM!	#NUM!	0.347120409	#NUM!	#NUM!	#NUM!	0.306675803	45.2	#NUM!	44.7	#NUM!	47.4	#NUM!	3.5	#NUM!	3.4	#NUM!	3.9	#NUM!
LCL2012-8	Marina	3	0.006410216	0.00370094	1.50434457	0.355335431	0.205153007	-2.135959384	0.03356105	0.019376481	0.038752962	0.645373145	0.641810621	0.723810621	0.729810621	0.058542491	0.033799523	0.067599046	0.3396525	0.046028462	0.026574545	0.05314909	0.300804232	12.9	4.1	22.3	4.4	11.8	4.4	-2.3	0.9	-0.3	0.9	-2.5	1
LCU2012-121	Marina	1	#NUM!	#NUM!	-3.110559486	#NUM!	#NUM!	-9.035567145	#NUM!	#NUM!	#NUM!	0.532048811	0.506936589	0.588936589	0.594936589	#NUM!	#NUM!	#NUM!	0.221876508	#NUM!	#NUM!	#NUM!	0.208204009	59.8	#NUM!	54.2	#NUM!	64	#NUM!	-0.4	#NUM!	-1.3	#NUM!	0.3	#NUM!
LCU2012-29	Marina	3	0.034259519	0.019779743	-1.513719259	0.34808894	0.200969243	-4.24750964	0.009188807	0.00530516	0.01061032	0.63656295	0.631325083	0.713325083	0.719325083	0.030057222	0.017353545	0.034707091	0.513199752	0.023632198	0.013644056	0.027288111	0.437254064	15.9	1.7	24.5	2.4	15	2.5	-3.8	0.4	-2	0.5	-4	0.6
NBS18	int.standards	3	0.011878149	0.006857853	-5.010639109	2.027351785	1.170492099	-22.79778318	0.019175877	0.011071198	0.022142396	0.380487878	0.326554905	0.408554905	0.414554905	0.115311861	0.066575334	0.133150668	0.298474533	0.090662824	0.052344206	0.104688412	0.268428457	185.8	20.3	119.2	16	221.5	19.7	0.5	2.1	-6.1	2.2	3.4	1.9
NBS19	all	3	0.011571614	0.006680875	2.001503943	0.184478859	0.106508919	-2.090796901	0.042065085	0.024286288	0.048572576	0.367118512	0.310643227	0.392643227	0.398643227	0.165377163	0.09548055	0.190961099	0.228966041	0.130026179	0.07507065	0.150141299	0.213778084	205.2	31.2	126.9	27.6	248.7	35.6	23.3	2.5	15.8	3.2	26.6	2.4
NIST 88B	int.standards	3	0.031517534	0.018196657	2.202067589	0.274259003	0.158343509	-6.125802091	0.040310745	0.023273419	0.046546839	0.573359682	0.556103114	0.638103114	0.644103114	0.040526317	0.02339788	0.04679576	0.292055847	0.031863421	0.018396355	0.036792709	0.263381828	40.2	6.3	41.4	6.3	41.8	6.4	-0.8	1.2	-0.6	1.2	-0.5	1.2
RRR-26A	Marina	3	0.031096963	0.01795384	-5.201211913	0.318140806	0.18367868	-8.044738861	0.036992649	0.021357716	0.042715432	0.472460516	0.436017014	0.518017014	0.524017014	0.034842081	0.020116085	0.040232169	0.442712269	0.027394246	0.015816075	0.03163215	0.381833969	95.9	10.9	75.7	9.8	106.3	10.6	5.9	1.5	3.1	1.5	7.3	1.3
RRR-32A	Marina	3	0.029576842	0.017076198	-4.485980598	0.076710393	0.044288766	-7.419534339	0.021797186	0.012584611	0.025169222	0.580060526	0.564078187	0.646078187	0.652078187	0.057462457	0.033175965	0.06635193	0.327322263	0.045179295	0.026084278	0.052168557	0.291109704	37.3	3.6	39.5	3.6	38.6	3.7	-2.7	0.7	-2.3	0.7	-2.4	0.7
RRR-36A	Marina	3	0.014561009	0.008406802	-3.556607887	0.275094435	0.158825846	-4.169984054	0.014864706	0.008582142	0.017164284	0.593650804	0.580252786	0.662252786	0.668252786	0.064839995	0.037435389	0.074870778	0.311342467	0.050979813	0.029433209	0.058866418	0.278545745	31.7	2.5	35.7	2.8	32.4	2.8	-0.5	0.5	0.3	0.6	-0.3	0.6
RRR-39	Marina	3	0.024021824	0.013869007	-3.328602731	0.01493818	0.008624562	-3.790135998	0.027062028	0.015624269	0.031248539	0.596214545	0.583304046	0.665304046	0.671304046	0.029899608	0.017262547	0.034525094	0.326624945	0.023508275	0.013572509	0.027145018	0.290561444	30.7	4	34.9	4.1	31.3	4.2	-0.3	0.8	0.5	0.8	-0.2	0.8
RRR-40	Marina	3	0.017411777	0.010052694	-5.359064387	0.403081287	0.23271909	-8.846057934	0.015751584	0.009094181	0.018188362	0.567917582	0.549626148	0.631626148	0.637626148	0.073261525	0.042297561	0.084595122	0.267853578	0.057601158	0.033256044	0.066512089	0.244353031	42.5	3.1	43	3	44.5	3	-3.1	0.6	-3	0.6	-2.8	0.6
RRR-44	Marina	3	0.016991378	0.009809977	-5.228583205	0.217837244	0.125768392	-8.602135788	0.03331339	0.019233495	0.03846699	0.623893756	0.616246722	0.698246722	0.704246722	0.061615914	0.035573965	0.071147929	0.293426487	0.048444911	0.027969682	0.055939364	0.264459481	20.3	4.3	27.6	4.6	19.8	4.6	-7.2	0.9	-5.7	0.9	-7.3	1
RRR-50	Marina	3	0.013006478	0.007509293	-4.793762262	0.311511383	0.179851181	-9.241081046	0.021578932	0.012458602	0.024917205	0.596815552	0.58401934	0.66601934	0.67201934	0.017976096	0.010378504	0.020757007	0.37758466	0.01413353	0.008159997	0.016319994	0.330628022	30.5	3.3	34.8	3.5	31	3.5	-5.8	0.7	-5	0.7	-5.7	0.7
TV04	all	7	0.038709475	0.014630806	1.43055977	0.088084341	0.033292752	-8.957108565	0.04446943	0.016807865	0.033615729	0.624272844	0.616697897	0.698697897	0.704697897	0.101042228	0.038190372	0.076380745	0.292930908	0.079443465	0.030026807	0.060053615	0.264069837	20.2	3.8	27.5	4.1	19.7	4.2	-7.6	0.8	-6.1	0.8	-7.7	0.9
